# Supplementary material for: Gold-catalyzed formation of indole derivatives from 2-alkynyl arylazides and oxygen-containing heterocycles
Source: Royal Society of Chemistry journal article supplement (doi:10.1039/c6ra09761h), 2016-01-01

## Supporting information

for

### Gold-Catalyzed formation of Indole Derivatives from 2-Alkynyl

### Arylazides and Oxygen-Containing Heterocycles

Xiaoxiang Zhang,<sup>a\*</sup> Xiaoping Sun,<sup>a</sup> Hui Fan,<sup>b</sup> Chang Lyu<sup>a</sup>, Ping Li<sup>a</sup>,

Haifei Zhang,<sup>a</sup> Weidong Rao<sup>a\*</sup>

---

<sup>a</sup>Jiangsu key lab of Biomass-based Green Fuels and Chemicals, College of Chemical Engineering, Nanjing Forestry University, Nanjing 210037, China. zhangxiaoxiang@njfu.edu.cn (X. Zhang); weidong@njfu.edu.cn (W. Rao).

<sup>b</sup>School of Petrochemical Engineering, Changzhou University, Changzhou 213164, China.

## General Considerations

Analytical thin layer chromatography (TLC) was performed using Merck 60 F254 pre-coated silica gel plate. Visualization was achieved by UV light (254 nm). Flash chromatography was performed using Merck silica gel 60 with freshly distilled solvents. Unless otherwise stated,  $^1\text{H}$  and  $^{13}\text{C}$  NMR spectra were measured on Bruker AVANCE III 600 MHz spectrometer. Unless otherwise stated, chemical shifts (ppm) were recorded with respect to TMS in  $\text{CDCl}_3$ . Multiplicities were given as: s (singlet), bs (broad singlet), d (doublet), t (triplet), dd (doublet, doublet) or m (multiplets). The number of protons (n) for a given resonance is indicated by nH. Coupling constants are reported as a J value in Hz. Infrared spectra were recorded on NICOLET 6700 FTIR Spectrometer. High Resolution Mass (HRMS) spectra were obtained using LTQ Orbitrap. Mass spectral data were reported in units of mass to charge (m/z).

## General procedure for gold-catalyzed formation of indole derivatives from 2-alkynyl arylazides and oxygen-containing heterocycles:

To a solution of 2-alkynyl arylazides **1** (0.1 mmol), oxygen-containing heterocycles **2** (0.5 mL) and MsOH (0.3 mmol) was added *t*BuXPhosAuNTf<sub>2</sub> (2 mol%). The mixture was stirred at room temperature or 60 °C and monitored by TLC analysis. On completion, the reaction mixture was directly subjected to purification by flash column chromatography on silica gel (eluent: petrol ether: ethyl acetate = 8:1 to 4:1) to give the desired product **3**.

**2-(2-((2-phenyl-1*H*-indol-3-yl)oxy)ethoxy)ethyl methanesulfonate (3a):**

yield: 35.6 mg (95%); brown oil; <sup>1</sup>H NMR (CDCl<sub>3</sub>, 600 MHz) δ: 2.99 (s, 3H), 3.70-3.71 (m, 2H), 3.77-3.78 (m, 2H), 4.25-4.26 (m, 2H), 4.33-4.34 (m, 2H), 7.11-7.13 (m, 1H), 7.18-7.21 (m, 1H), 7.29-7.31 (m, 1H), 7.33 (d, *J* = 8.1 Hz, 1H), 7.44-7.47 (m, 2H), 7.65 (d, *J* = 7.8 Hz, 1H), 7.84 (d, *J* = 7.8 Hz, 2H), 7.97 (br, 1H); <sup>13</sup>C NMR (CDCl<sub>3</sub>, 150 MHz) δ: 37.6, 68.9, 69.2, 70.4, 72.8, 111.4, 117.9, 119.8, 122.6, 122.8, 124.8, 125.7, 127.2, 128.8, 131.3, 133.7, 135.9; IR (neat): 2924, 1541, 1173, 785 cm<sup>-1</sup>; HRMS (ESI) calcd. For C<sub>19</sub>H<sub>21</sub>NO<sub>5</sub>SNa [M+Na]<sup>+</sup> 398.1038, found: 398.1015.

**2-(2-((2-(4-methoxyphenyl)-1*H*-indol-3-yl)oxy) ethoxy)ethyl methanesulfonate (3b):**

yield: 34.4 mg (85%); brown oil; <sup>1</sup>H NMR (CDCl<sub>3</sub>, 600 MHz) δ: 3.00 (s, 3H), 3.71-3.73 (m, 2H), 3.77-3.78 (m, 2H), 3.85 (s, 3H), 4.23-4.24 (m, 2H), 4.34-4.36 (m, 2H), 7.00 (d, *J* = 8.8 Hz, 2H), 7.09-7.16 (m, 2H), 7.31 (d, *J* = 8.1 Hz, 1H), 7.61 (d, *J* = 7.4 Hz, 1H), 7.77 (d, *J* = 8.7 Hz, 2H), 7.89 (br, 1H); <sup>13</sup>C NMR (CDCl<sub>3</sub>, 150 MHz) δ: 37.6, 55.3, 68.9, 69.2, 70.5, 72.7, 111.2, 114.3, 117.6, 119.7, 122.4, 124.0, 124.9, 127.1, 133.5, 158.8; IR (neat): 2915, 1182, 744 cm<sup>-1</sup>; HRMS (ESI) calcd. For C<sub>20</sub>H<sub>23</sub>NO<sub>6</sub>SNa [M+Na]<sup>+</sup> 428.1144, found: 428.1118.

**2-(2-((2-(4-ethylphenyl)-1*H*-indol-3-yl)oxy)ethoxy)ethyl methanesulfonate (3c):**

yield: 37.5 mg (93%); brown oil; <sup>1</sup>H NMR (CDCl<sub>3</sub>, 600 MHz) δ: 1.28 (t, *J* = 7.7 Hz, 3H), 2.67-2.71 (q, *J* = 7.7 Hz, 3H), 3.00 (s, 3H), 3.71-3.72 (m, 2H), 3.77-3.79 (m, 2H), 4.24-4.26 (m, 2H), 4.34-4.36 (m, 2H), 7.10-7.12 (m, 1H), 7.16-7.19 (m, 1H), 7.28 (d, *J* = 8.3 Hz, 2H), 7.31 (d, *J* = 8.2 Hz, 1H), 7.63 (d, *J* = 7.9 Hz, 1H), 7.75 (d, *J* = 8.2 Hz, 2H), 7.97

(br, 1H);  $^{13}\text{C}$  NMR ( $\text{CDCl}_3$ , 150 MHz)  $\delta$ : 15.4, 28.6, 37.6, 68.9, 69.2, 70.4, 72.7, 111.3, 117.7, 119.7, 122.6, 122.7, 125.0, 125.7, 128.3, 128.7, 133.6, 135.4, 143.4; IR (neat): 2931, 1176, 771  $\text{cm}^{-1}$ ; HRMS (ESI) calcd. For  $\text{C}_{21}\text{H}_{25}\text{NO}_5\text{SNa}$   $[\text{M}+\text{Na}]^+$  426.1351, found: 426.1324.

**2-(2-((2-(*p*-tolyl)-1*H*-indol-3-yl)oxy)ethoxy)ethyl methanesulfonate (3d):**

yield: 34.2 mg (88%); brown oil;  $^1\text{H}$  NMR ( $\text{CDCl}_3$ , 600 MHz)  $\delta$ : 2.39 (s, 3H), 3.00 (s, 3H), 3.71-3.73 (m, 2H), 3.77-3.79 (m, 2H), 4.24-4.25 (m, 2H), 4.34-4.36 (m, 2H), 7.10-7.12 (m, 1H), 7.16-7.19 (m, 1H), 7.25 (d,  $J = 7.9$  Hz, 2H), 7.31 (d,  $J = 8.1$  Hz, 1H), 7.63 (d,  $J = 7.8$  Hz, 1H), 7.73 (d,  $J = 8.2$  Hz, 2H), 7.93 (br, 1H);  $^{13}\text{C}$  NMR ( $\text{CDCl}_3$ , 150 MHz)  $\delta$ : 21.2, 37.6, 68.9, 69.2, 70.5, 72.7, 111.3, 117.7, 119.7, 122.6, 122.7, 125.0, 125.6, 128.5, 129.6, 133.6, 135.4, 137.1; IR (neat): 2923, 1175, 770  $\text{cm}^{-1}$ ; HRMS (ESI) calcd. For  $\text{C}_{20}\text{H}_{23}\text{NO}_5\text{SNa}$   $[\text{M}+\text{Na}]^+$  412.1195, found: 412.1170.

**2-(2-((2-(4-chlorophenyl)-1*H*-indol-3-yl)oxy)ethoxy)ethyl methanesulfonate(3e):**

yield: 27.0 mg (66%); brown oil;  $^1\text{H}$  NMR ( $\text{CDCl}_3$ , 600 MHz)  $\delta$ : 3.00 (s, 3H), 3.72-3.73 (m, 2H), 3.77-3.79 (m, 2H), 4.26 (br, 2H), 4.34-4.36 (m, 2H), 7.10-7.20 (m, 2H), 7.31 (d,  $J = 8.2$  Hz, 1H), 7.40 (d,  $J = 8.6$  Hz, 2H), 7.64 (d,  $J = 7.1$  Hz, 1H), 7.77 (d,  $J = 8.5$  Hz, 2H), 7.92 (br, 1H);  $^{13}\text{C}$  NMR ( $\text{CDCl}_3$ , 150 MHz)  $\delta$ : 37.6, 69.0, 69.1, 70.4, 72.7, 111.5, 118.0, 120.0, 123.2, 123.6, 126.8, 129.0, 129.8, 132.7, 133.9; IR (neat): 2923, 1174, 746  $\text{cm}^{-1}$ ; HRMS (ESI) calcd. For  $\text{C}_{19}\text{H}_{20}\text{NO}_5\text{SClNa}$   $[\text{M}+\text{Na}]^+$  432.0648, found: 432.0622.

**2-(2-((2-(thiophen-3-yl)-1*H*-indol-3-yl)oxy)ethoxy)ethyl methanesulfonate(3f):**

yield: 29.0 mg (76%); brown oil;  $^1\text{H}$  NMR ( $\text{CDCl}_3$ , 600 MHz)  $\delta$ : 3.02 (s, 3H), 3.75-3.76 (m, 2H), 3.81-3.82 (m, 2H), 4.29-4.30 (m, 2H), 4.37-4.39 (m, 2H), 7.10-7.12 (m, 1H), 7.17-7.19 (m, 1H), 7.31 (d,  $J = 8.1$  Hz, 1H), 7.42-7.43 (m, 1H), 7.62-7.66 (m, 3H), 7.91 (br, 1H);  $^{13}\text{C}$  NMR ( $\text{CDCl}_3$ , 150 MHz)  $\delta$ : 37.6, 69.0, 69.1, 70.4, 72.7, 111.5, 118.0, 120.0, 123.2, 123.6, 126.8, 129.0, 129.8, 132.7, 133.9; IR (neat): 2923, 1075, 769  $\text{cm}^{-1}$ ; HRMS (ESI) calcd. For  $\text{C}_{17}\text{H}_{19}\text{NO}_5\text{S}_2\text{Na}$   $[\text{M}+\text{Na}]^+$  404.0602, found: 404.0580.

**2-(2-((2-pentyl-1*H*-indol-3-yl)oxy)ethoxy)ethyl methanesulfonate(3g):**

yield: 18.7 mg (63%); brown oil;  $^1\text{H}$  NMR ( $\text{CDCl}_3$ , 600 MHz)  $\delta$ : 0.90 (t,  $J = 7.1$  Hz, 3H), 1.34-1.37 (m, 4H), 1.64-1.69 (m, 2H), 2.74 (t,  $J = 7.6$  Hz, 2H), 3.00 (s, 3H), 3.81-3.83 (m, 2H), 3.84-3.86 (m, 2H), 4.19-4.20 (m, 2H), 4.42-4.44 (m, 2H), 7.06-7.08 (m, 1H), 7.10-7.12 (m, 1H), 7.23 (d,  $J = 8.0$  Hz, 1H), 7.55 (d,  $J = 8.1$  Hz, 1H), 7.54 (br, 1H);  $^{13}\text{C}$  NMR ( $\text{CDCl}_3$ , 150 MHz)  $\delta$ : 14.0, 22.4, 24.6, 28.9, 31.5, 37.6, 69.1, 69.3, 70.6, 73.4, 110.8, 116.9, 119.2, 121.3, 121.8, 127.5, 132.8, 134.5; IR (neat): 2925, 1075, 746  $\text{cm}^{-1}$ ; HRMS (ESI) calcd. For  $\text{C}_{18}\text{H}_{27}\text{NO}_5\text{SNa}$   $[\text{M}+\text{Na}]^+$  392.1508, found: 392.1490.

**2-(2-((2-*tert*-butyl)-1*H*-indol-3-yl)oxy)ethoxy)ethyl methanesulfonate(3h):**

yield: 10.0 mg (28%); brown oil;  $^1\text{H}$  NMR ( $\text{CDCl}_3$ , 600 MHz)  $\delta$ : 1.45 (s, 9H), 3.08 (s, 3H), 3.89-3.90 (m, 4H), 4.22-4.23 (m, 2H), 4.45-4.46 (m, 2H), 7.05-7.07 (m, 1H), 7.10-7.12 (m, 1H), 7.51 (br, 1H), 7.55 (d,  $J = 8.0$  Hz, 2H);  $^{13}\text{C}$  NMR ( $\text{CDCl}_3$ , 150 MHz)  $\delta$ : 29.7, 32.0, 37.7, 69.2, 69.3, 70.9, 73.2, 110.9, 117.2, 119.2, 121.3, 122.4, 131.9, 133.6,

133.8; IR (neat): 2924, 1174, 748  $\text{cm}^{-1}$ ; HRMS (ESI) calcd. For  $\text{C}_{17}\text{H}_{25}\text{NO}_5\text{SNa}$   $[\text{M}+\text{Na}]^+$  378.1351, found: 378.1330.

**2-(2-((2-butyl-1*H*-indol-3-yl)oxy)ethoxy)ethyl methanesulfonate(3i):**

yield: 17.9 mg (60%); brown oil;  $^1\text{H}$  NMR ( $\text{CDCl}_3$ , 600 MHz)  $\delta$ : 0.94 (t,  $J = 7.4$  Hz, 3H), 1.38-1.43 (m, 2H), 1.62-1.67 (m, 4H), 2.75 (t,  $J = 7.6$  Hz, 2H), 3.06 (s, 1H), 3.81-3.83 (m, 2H), 3.84-3.86 (m, 2H), 4.19-4.20 (m, 2H), 4.42-4.44 (m, 2H), 7.05-7.08 (m, 1H), 7.09-7.12 (m, 1H), 7.23 (d,  $J = 8.0$  Hz, 1H), 7.54-7.55 (m, 2H);  $^{13}\text{C}$  NMR ( $\text{CDCl}_3$ , 150 MHz)  $\delta$ : 13.8, 22.5, 24.4, 31.4, 37.7, 69.1, 69.3, 70.6, 73.4, 110.8, 116.9, 119.2, 121.3, 121.8, 127.5, 132.8, 134.5; IR (neat): 2925, 1175, 755  $\text{cm}^{-1}$ ; HRMS (ESI) calcd. For  $\text{C}_{17}\text{H}_{25}\text{NO}_5\text{SNa}$   $[\text{M}+\text{Na}]^+$  378.1351, found: 378.1326.

**2-(2-((6-chloro-2-phenyl-1*H*-indol-3-yl)oxy)ethoxy)ethyl methanesulfonate(3l):**

yield: 36.8 mg (90%); brown oil;  $^1\text{H}$  NMR ( $\text{CDCl}_3$ , 600 MHz)  $\delta$ : 3.00 (s, 3H), 3.70-3.71 (m, 2H), 3.76-3.77 (m, 2H), 4.21-4.22 (m, 2H), 4.33-4.34 (m, 2H), 7.06-7.08 (m, 1H), 7.29-7.32 (m, 2H), 7.43-7.46 (m, 2H), 7.54 (d,  $J = 8.5$  Hz, 1H), 7.80-7.82 (m, 2H), 8.04 (br, 1H);  $^{13}\text{C}$  NMR ( $\text{CDCl}_3$ , 150 MHz)  $\delta$ : 37.6, 69.0, 69.1, 70.4, 72.9, 111.3, 118.8, 120.5, 121.2, 125.5, 125.7, 127.4, 128.6, 128.9, 130.9, 133.9, 135.7; IR (neat): 2924, 1074, 770  $\text{cm}^{-1}$ ; HRMS (ESI) calcd. For  $\text{C}_{19}\text{H}_{21}\text{NO}_5\text{SClNa}$   $[\text{M}+\text{Na}]^+$  432.0648, found: 432.0622.

**2-(2-((5,7-dichloro-2-phenyl-1*H*-indol-3-yl)oxy)ethoxy)ethyl methanesulfonate(3m):**

yield: 24.8 mg (56%); brown oil;  $^1\text{H}$  NMR ( $\text{CDCl}_3$ , 600 MHz)  $\delta$ : 3.02 (s, 3H), 3.72-3.73 (m, 2H), 3.76-3.78 (m, 2H), 4.19-4.21 (m, 2H), 4.35-4.36 (m, 2H), 7.19 (s, 1H), 7.35-

7.37 (m, 1H), 7.47-7.50 (m, 2H), 7.54 (s, 1H), 7.84-7.86 (m, 2H), 8.07 (br, 1H); <sup>13</sup>C NMR (CDCl<sub>3</sub>, 150 MHz) δ: 37.6, 69.0, 69.0, 70.3, 73.1, 116.2, 117.3, 122.1, 124.5, 125.5, 126.0, 127.4, 128.1, 129.0, 129.1, 130.3, 135.7; IR (neat): 2924, 1174, 772 cm<sup>-1</sup>; HRMS (ESI) calcd. For C<sub>19</sub>H<sub>19</sub>NO<sub>5</sub>SCl<sub>2</sub>Na [M+Na]<sup>+</sup> 466.0259, found: 466.0233.

**5,7-dichloro-2-phenyl-1*H*-indol-3-yl methanesulfonate(4b):**

yield: 10.3 mg (29%); brown oil; <sup>1</sup>H NMR (CDCl<sub>3</sub>, 600 MHz) δ: 2.80 (s, 3H), 7.15-7.16 (m, 1H), 7.33-7.36 (m, 1H), 7.41-7.44 (m, 2H), 7.55 (s, 1H), 7.65-7.67 (m, 2H), 8.24 (br, 1H); <sup>13</sup>C NMR (CDCl<sub>3</sub>, 150 MHz) δ: 37.3, 117.1, 117.4, 123.1, 124.1, 125.1, 127.1, 128.6, 128.8, 128.9, 129.5, 130.2, 134.3; IR (neat): 2923, 1075, 775 cm<sup>-1</sup>; HRMS (ESI) calcd. For C<sub>15</sub>H<sub>11</sub>NO<sub>3</sub>SCl<sub>2</sub>Na [M+Na]<sup>+</sup> 377.9734, found: 377.9738.

**2-((5,7-dimethyl-2-phenyl-1*H*-indol-3-yl)oxy)ethoxyethyl methanesulfonate(3n):**

yield: 17.7 mg (44%); brown oil; <sup>1</sup>H NMR (CDCl<sub>3</sub>, 600 MHz) δ: 2.43 (s, 3H), 2.47 (s, 3H), 3.00 (s, 3H), 3.71-3.72 (m, 2H), 3.77-3.79 (m, 2H), 4.25-4.26 (m, 2H), 4.34-4.36 (m, 2H), 6.85 (s, 1H), 7.28-7.31 (m, 2H), 7.44-7.47 (m, 2H), 7.59 (br, 1H), 7.85 (d, *J* = 7.3 Hz, 2H); <sup>13</sup>C NMR (CDCl<sub>3</sub>, 150 MHz) δ: 16.1, 21.4, 37.6, 69.0, 69.3, 70.5, 72.7, 115.2, 120.2, 122.4, 124.8, 125.3, 125.7, 127.1, 127.6, 128.8, 129.4, 131.7, 136.1; IR (neat): 2923, 1174, 768 cm<sup>-1</sup>; HRMS (ESI) calcd. For C<sub>21</sub>H<sub>25</sub>NO<sub>5</sub>SNa [M+Na]<sup>+</sup> 426.1351, found: 426.1324.

**5-((2-phenyl-1*H*-indol-3-yl)oxy)pentyl methanesulfonate (3o):**

yield: 27.2 mg (73%); brown oil;  $^1\text{H}$  NMR ( $\text{CDCl}_3$ , 600 MHz)  $\delta$ : 1.61-1.67 (m, 2H), 1.77-1.86 (m, 4H), 4.13-4.15 (m, 2H), 4.23 (t,  $J = 6.5$  Hz, 2H), 7.13-7.15 (m, 1H), 7.21-7.23 (m, 1H), 7.31-7.36 (m, 2H), 7.46-7.49 (m, 2H), 7.65 (d,  $J = 7.7$  Hz, 1H), 7.83 (d,  $J = 7.4$  Hz, 2H), 7.91 (br, 1H);  $^{13}\text{C}$  NMR ( $\text{CDCl}_3$ , 150 MHz)  $\delta$ : 22.2, 28.9, 29.6, 37.3, 69.8, 73.4, 111.4, 118.0, 119.7, 122.8, 124.6, 125.7, 127.1, 128.8, 131.5, 133.8; IR (neat): 2922, 1071, 768  $\text{cm}^{-1}$ ; HRMS (ESI) calcd. For  $\text{C}_{20}\text{H}_{23}\text{NO}_4\text{SNa}$   $[\text{M}+\text{Na}]^+$  396.1245, found: 396.1267.

**2-((2-phenyl-1*H*-indol-3-yl)oxy)ethoxy)ethyl 4-methylbenzenesulfonate (5):**

yield: 27.6 mg (61%); yellow oil;  $^1\text{H}$  NMR ( $\text{CDCl}_3$ , 600 MHz)  $\delta$ : 2.38 (s, 3H), 3.63-3.65 (m, 2H), 3.67-3.69 (m, 2H), 4.11-4.13 (m, 2H), 4.15-4.16 (m, 2H), 7.09-7.11 (m, 1H), 7.16-7.21 (m, 1H), 7.27 (d,  $J = 7.8$  Hz, 3H), 7.33 (d,  $J = 8.4$  Hz, 1H), 7.40-7.42 (m, 2H), 7.63-7.65 (m, 1H), 7.78 (d,  $J = 8.4$  Hz, 2H), 7.82 (d,  $J = 7.8$  Hz, 2H), 7.94 (br, 1H);  $^{13}\text{C}$  NMR ( $\text{CDCl}_3$ , 150 MHz)  $\delta$ : 21.5, 68.6, 69.2, 70.3, 72.8, 111.3, 118.0, 118.1, 119.7, 119.8, 122.7, 122.8, 124.8, 125.7, 127.1, 127.9, 128.8, 129.8, 133.0, 144.7; IR (neat): 2924, 1075, 776  $\text{cm}^{-1}$ ; HRMS (ESI) calcd. For  $\text{C}_{25}\text{H}_{25}\text{NO}_5\text{SNa}$   $[\text{M}+\text{Na}]^+$  474.1351, found: 474.1360.



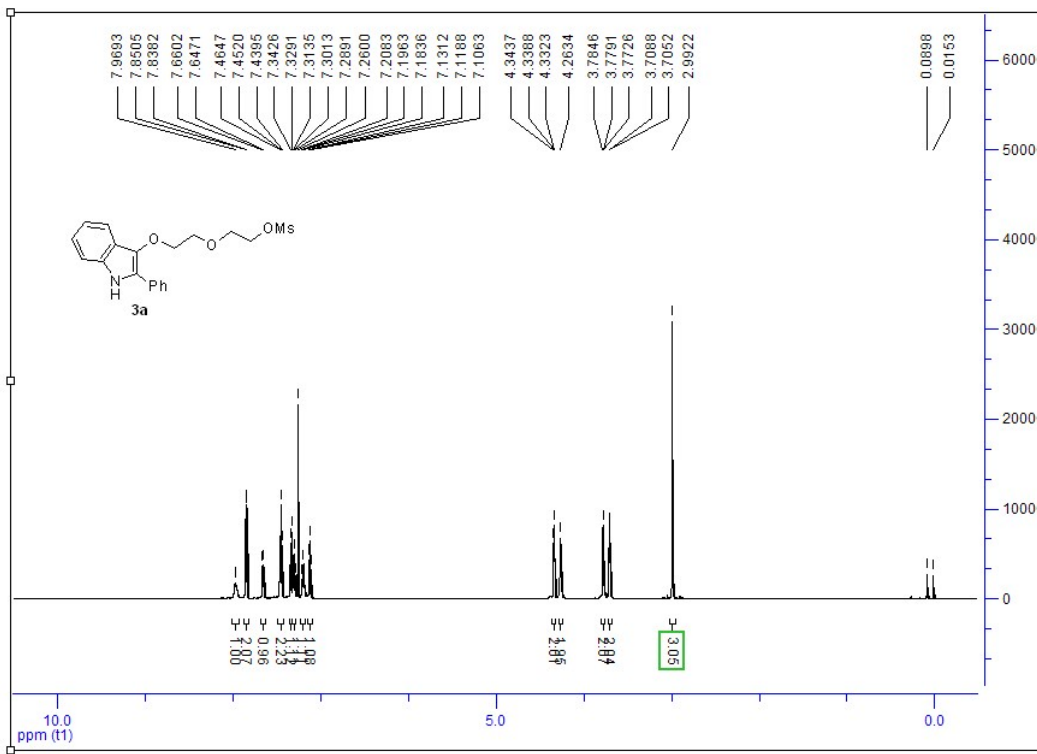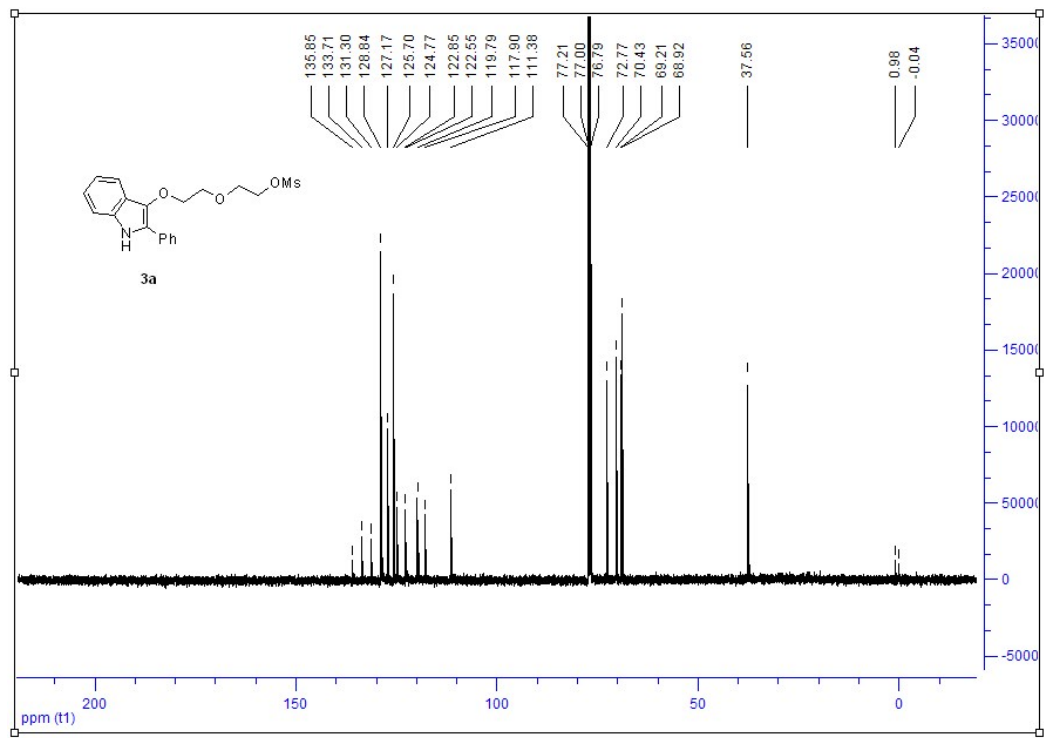

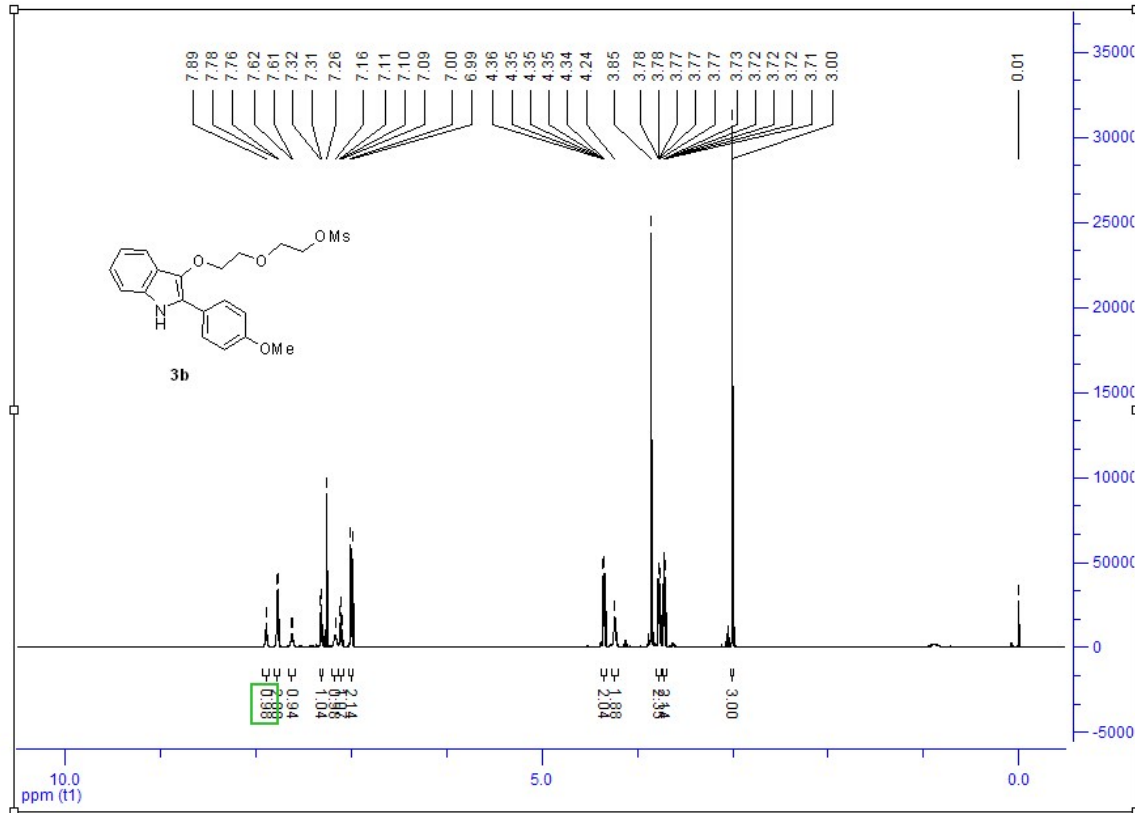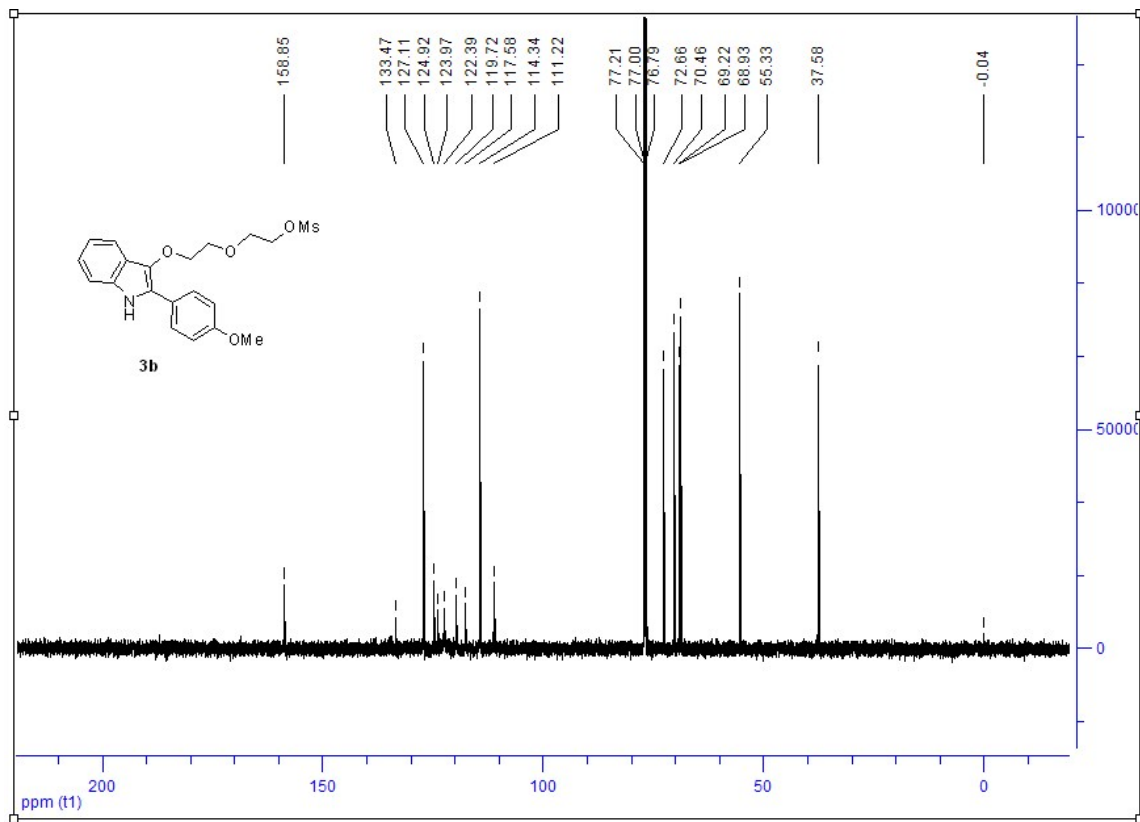

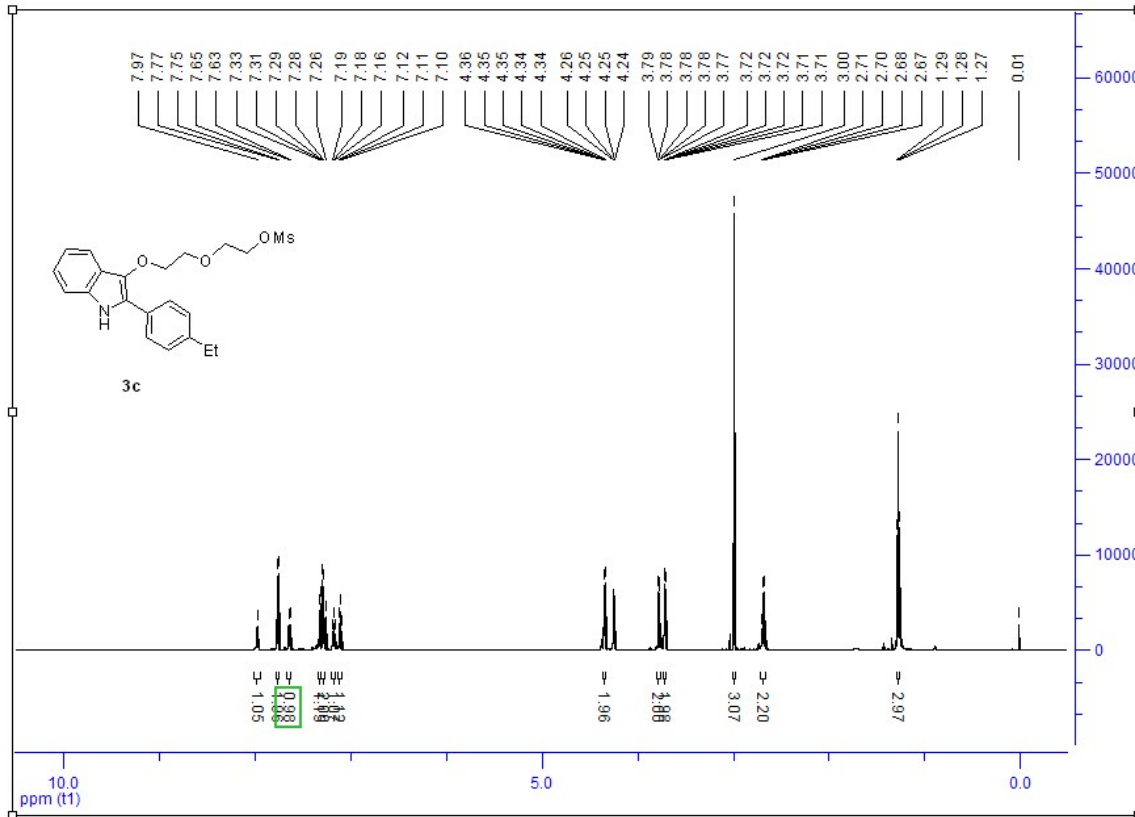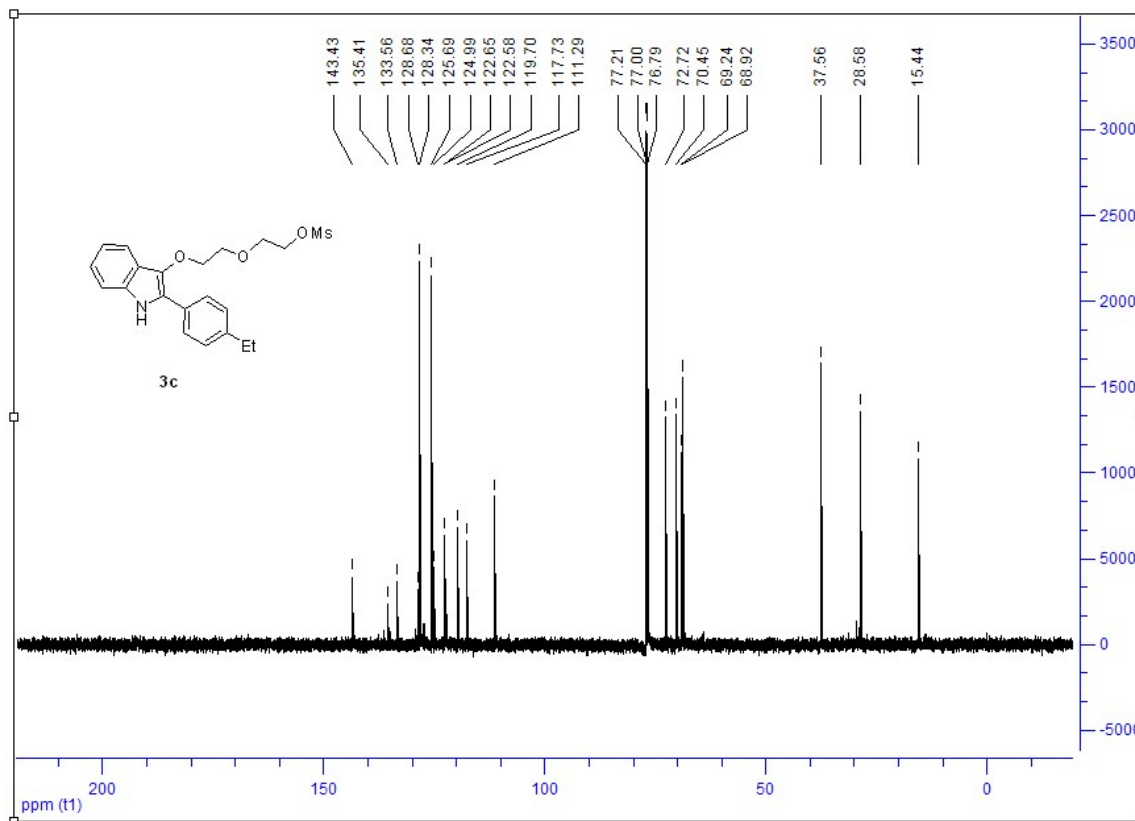

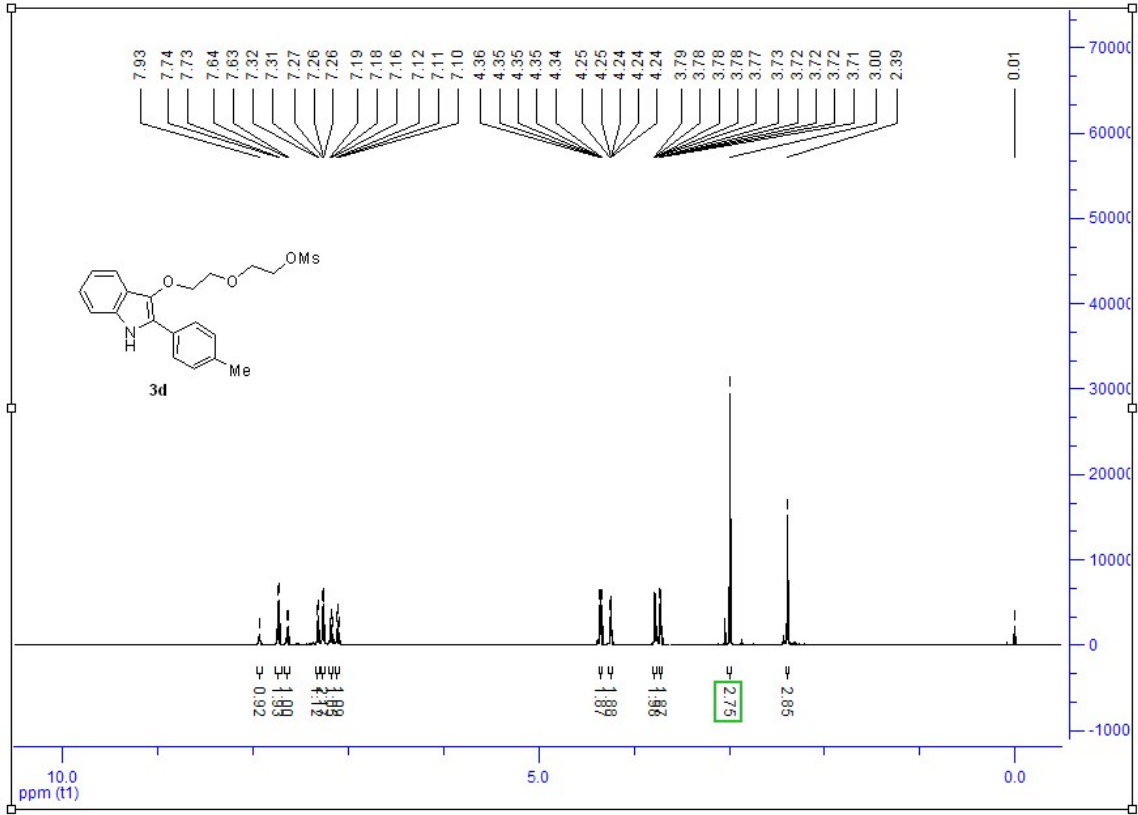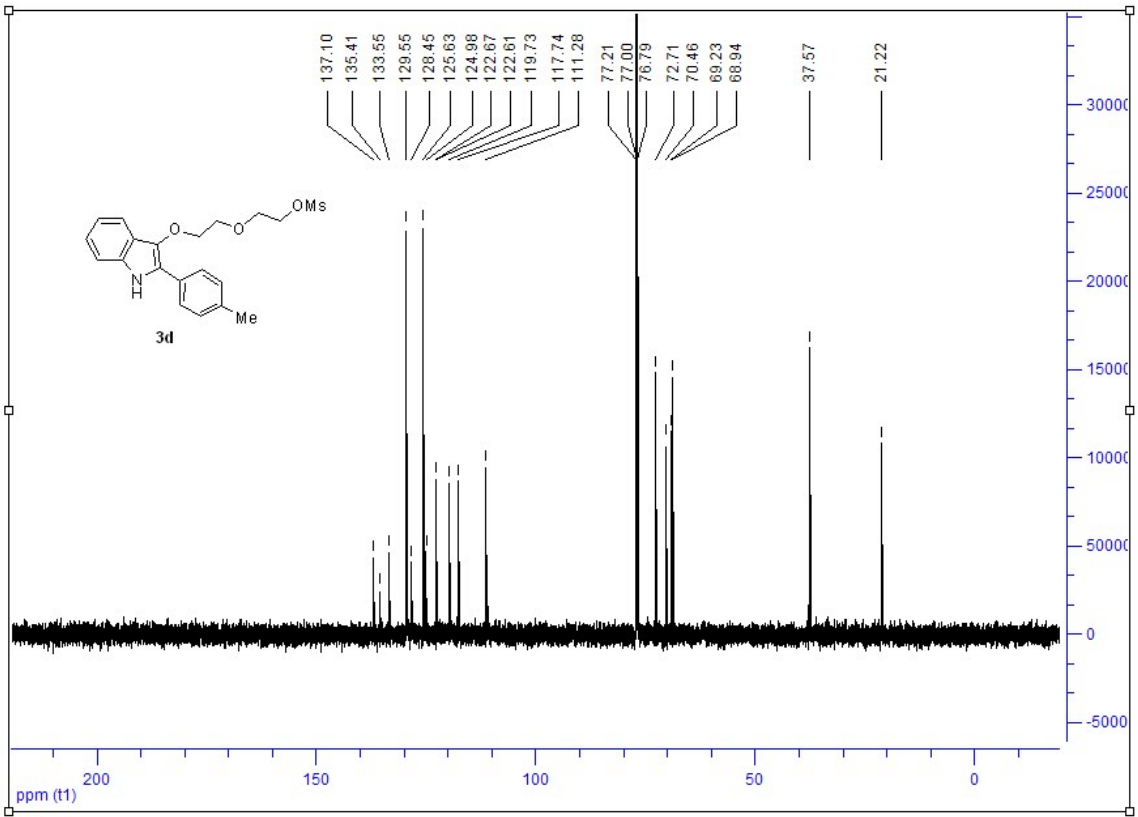

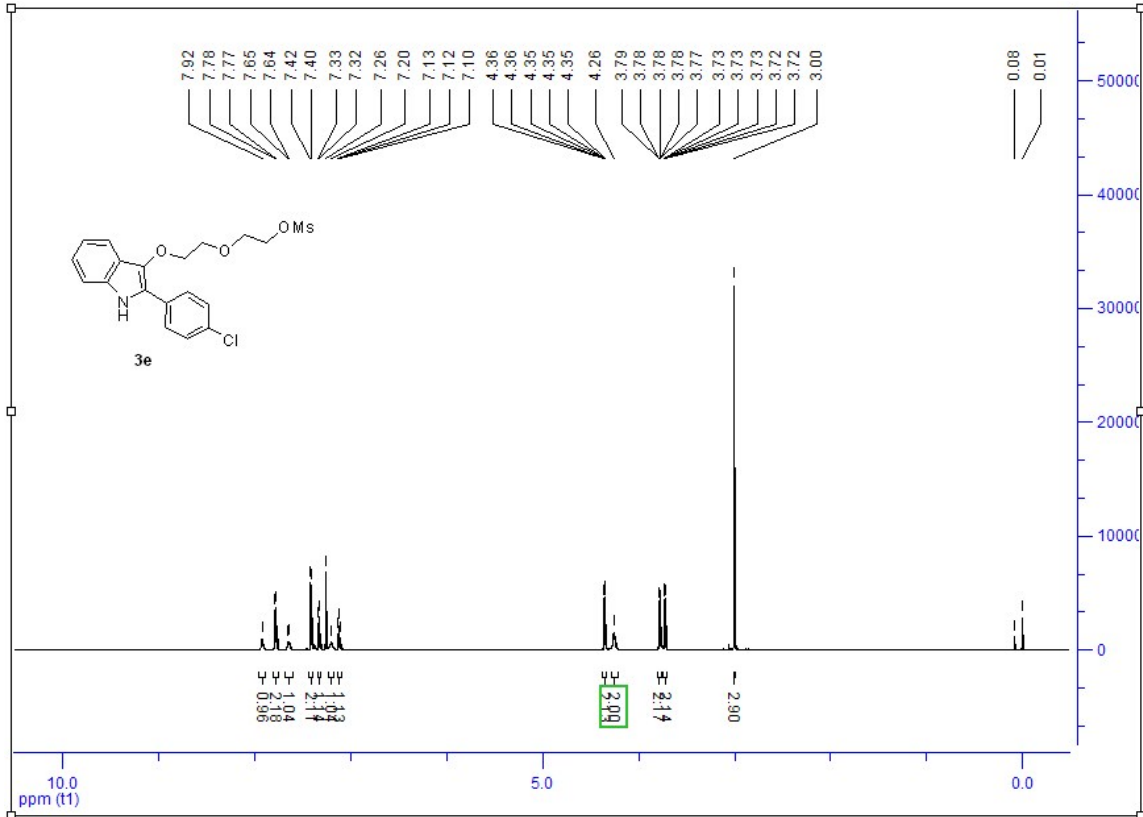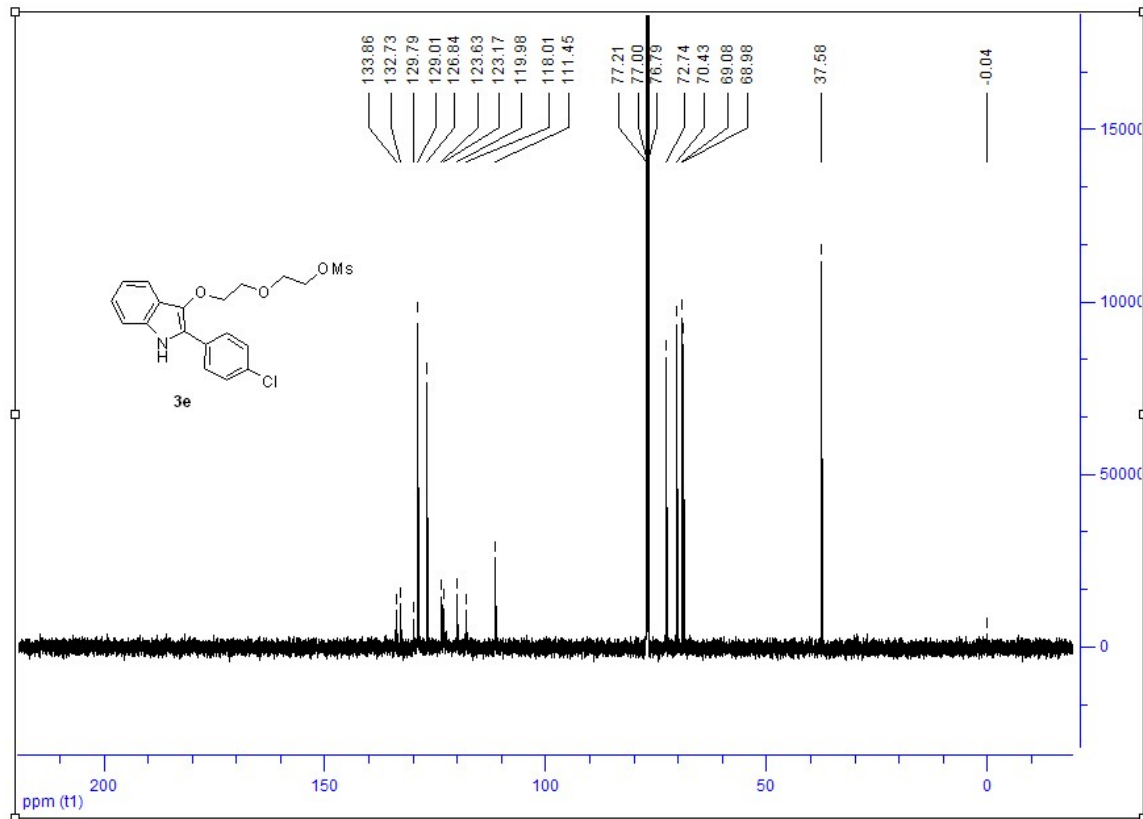



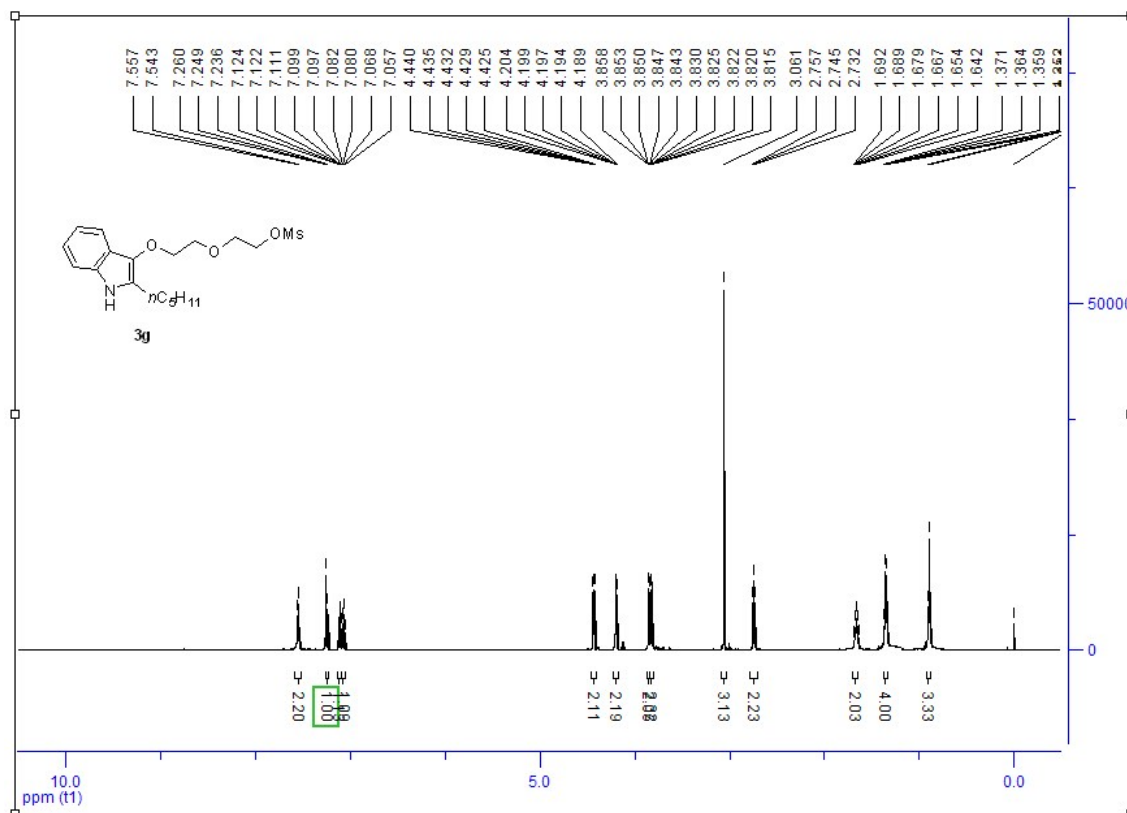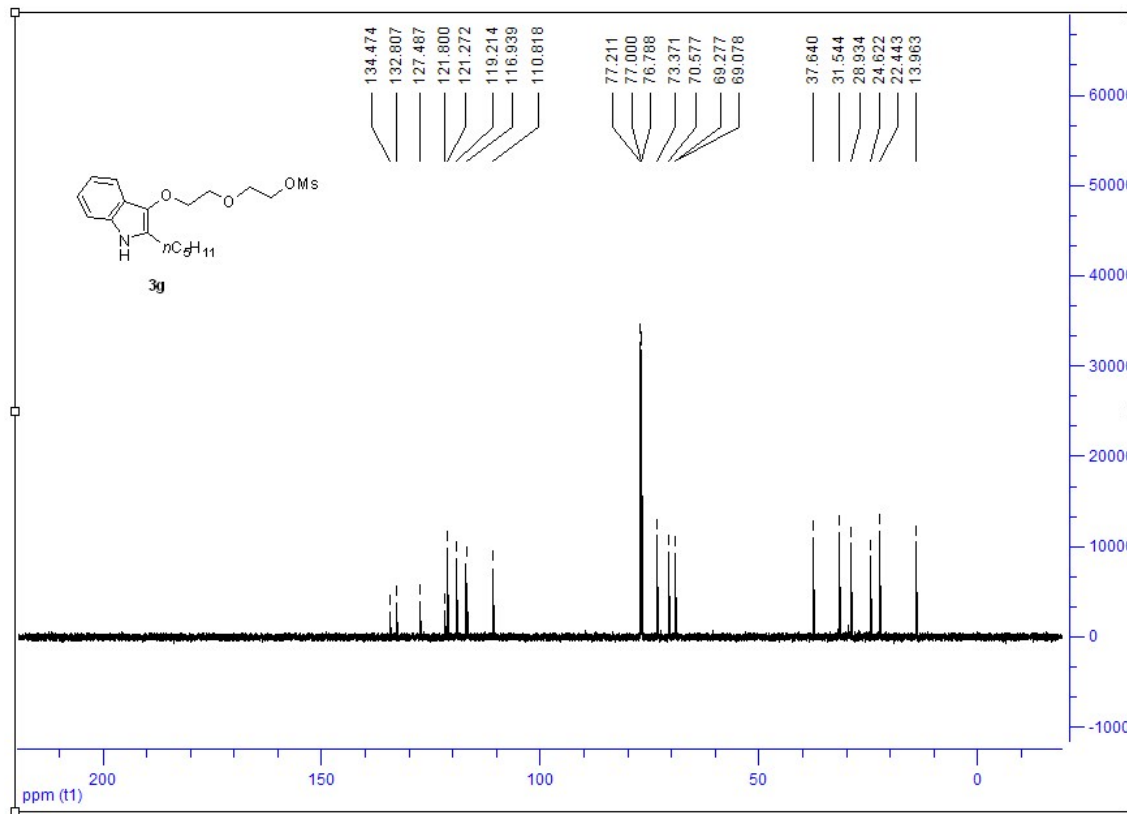

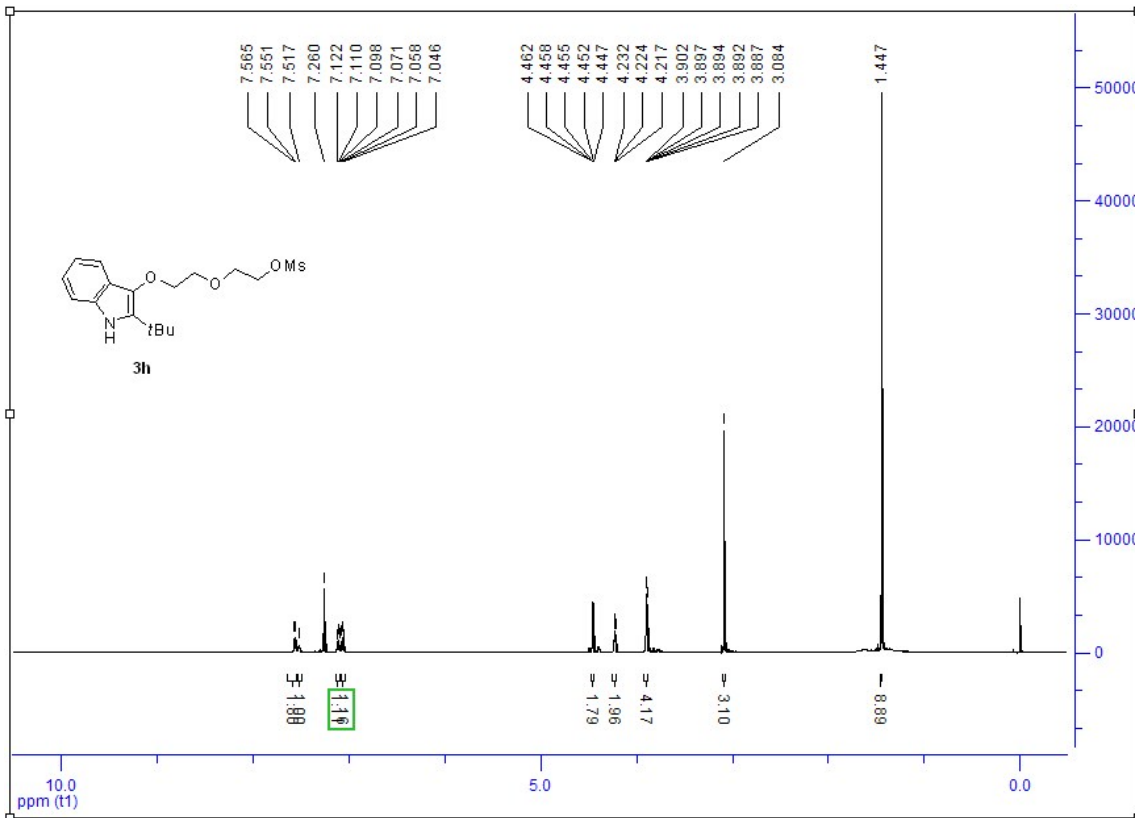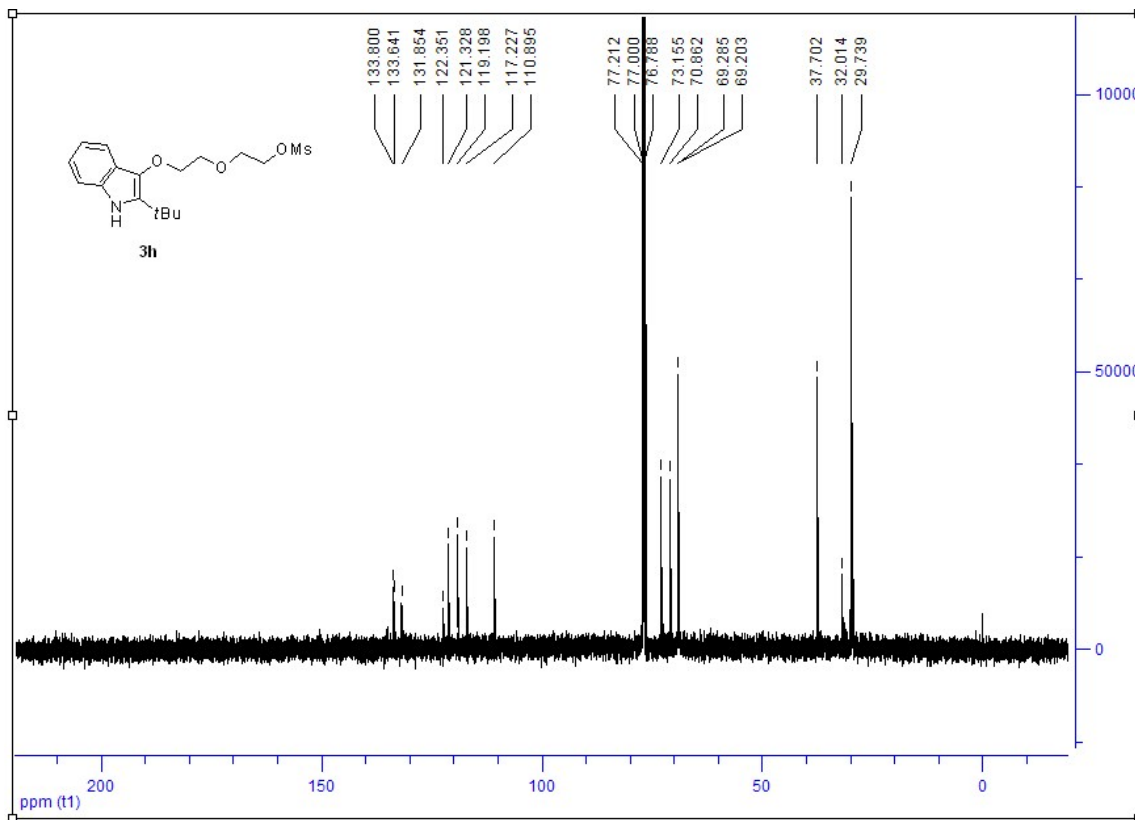



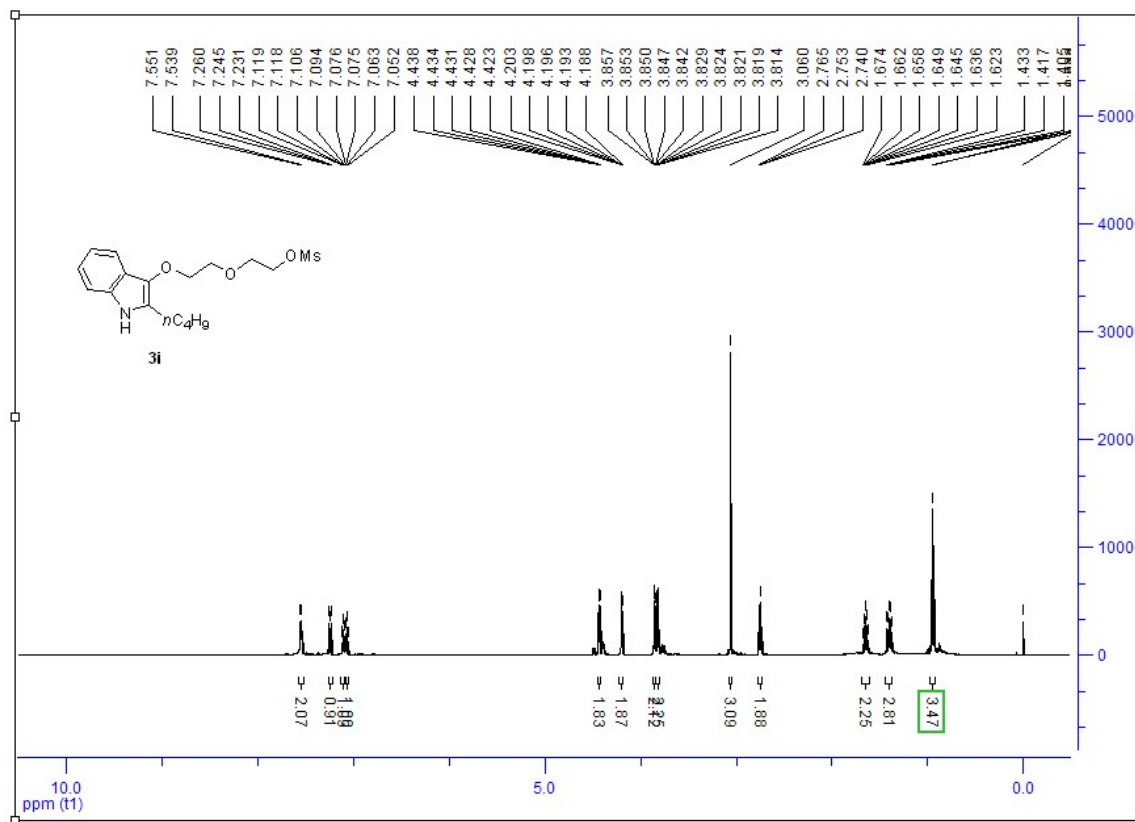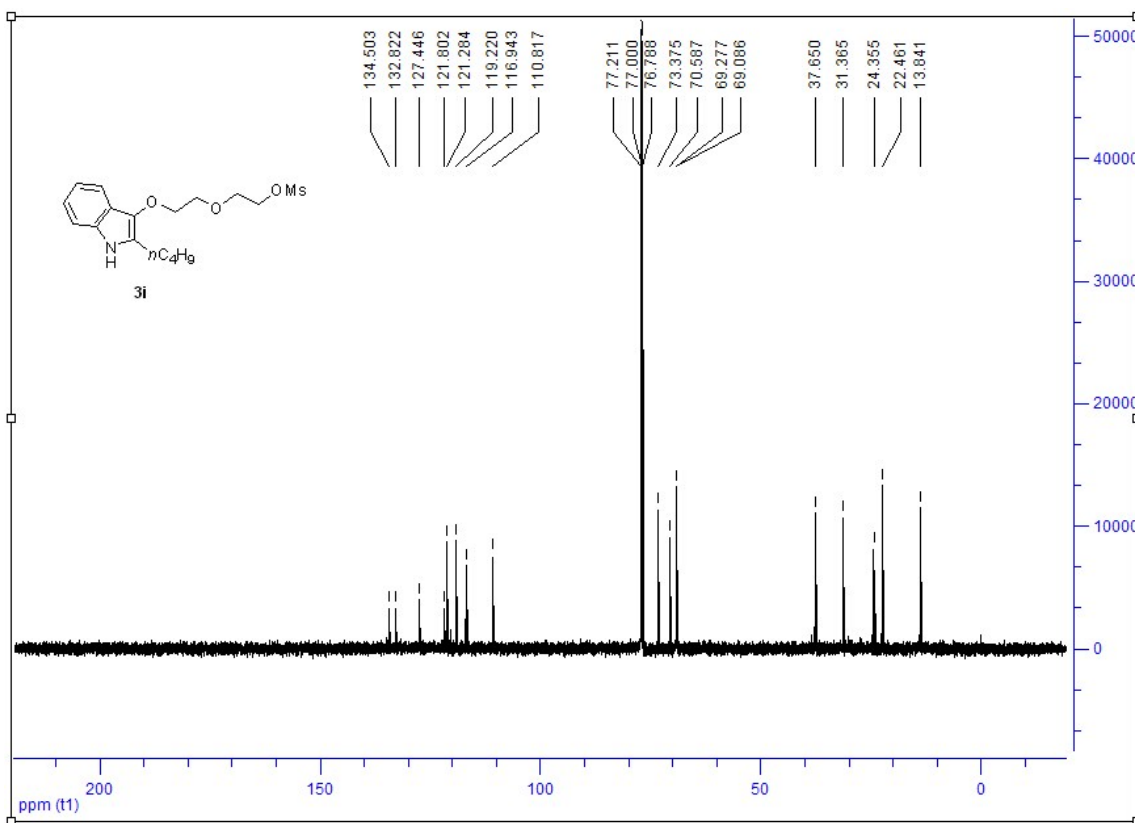

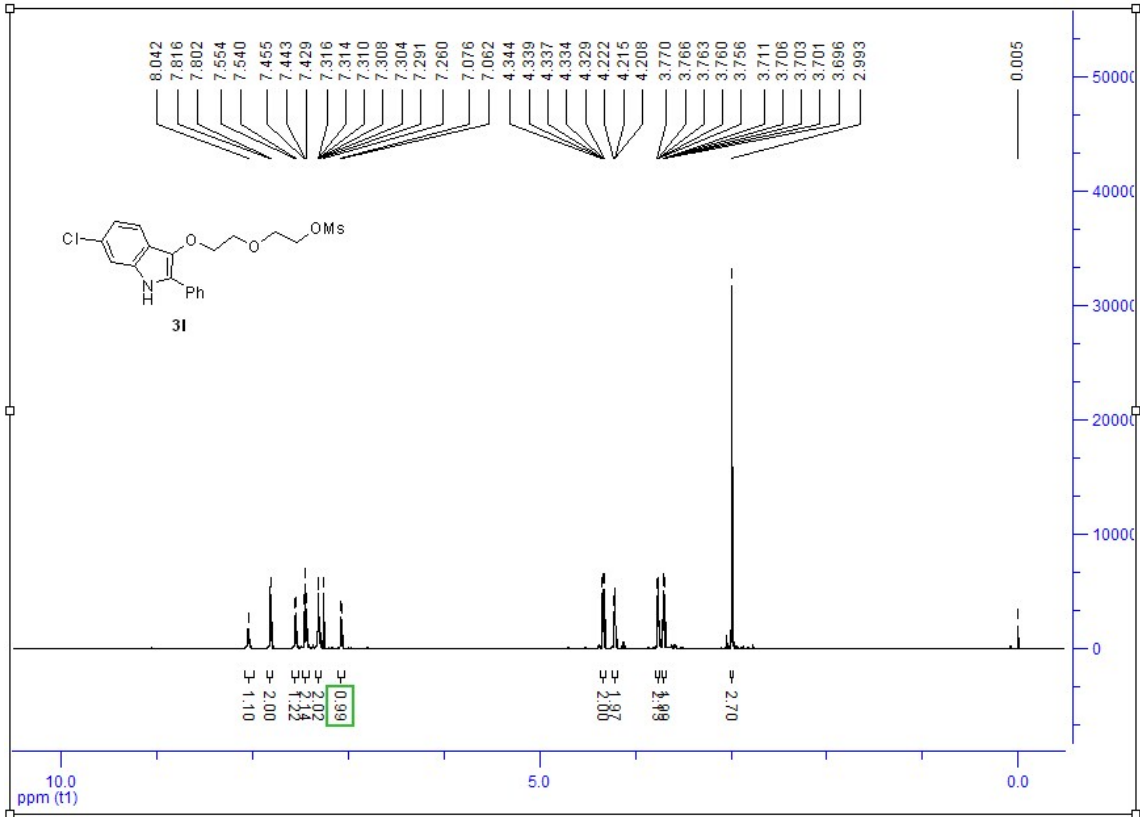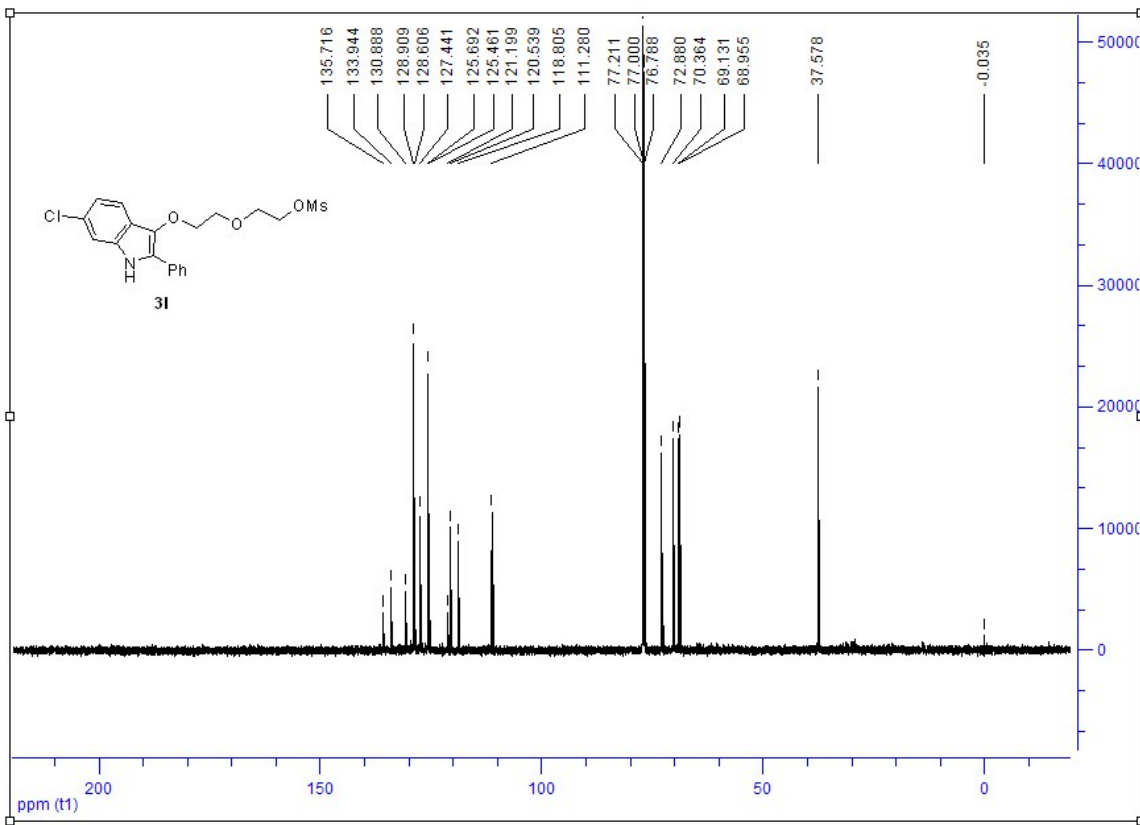

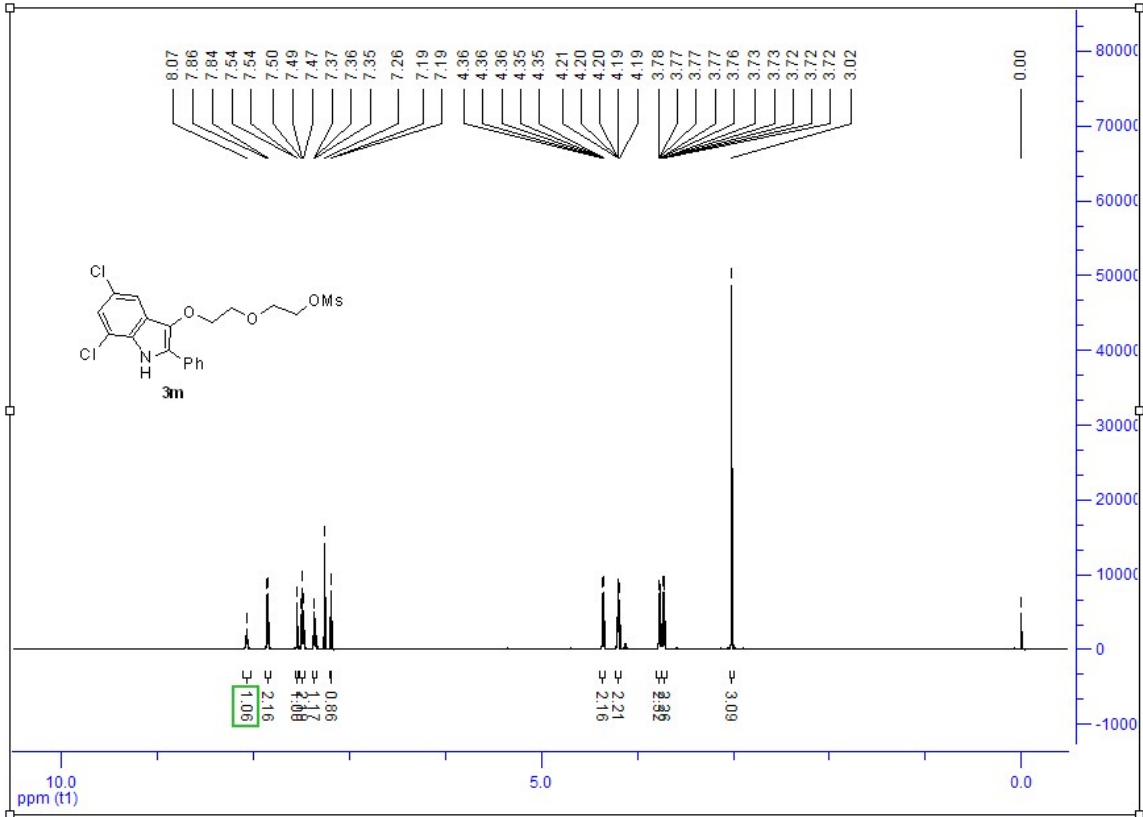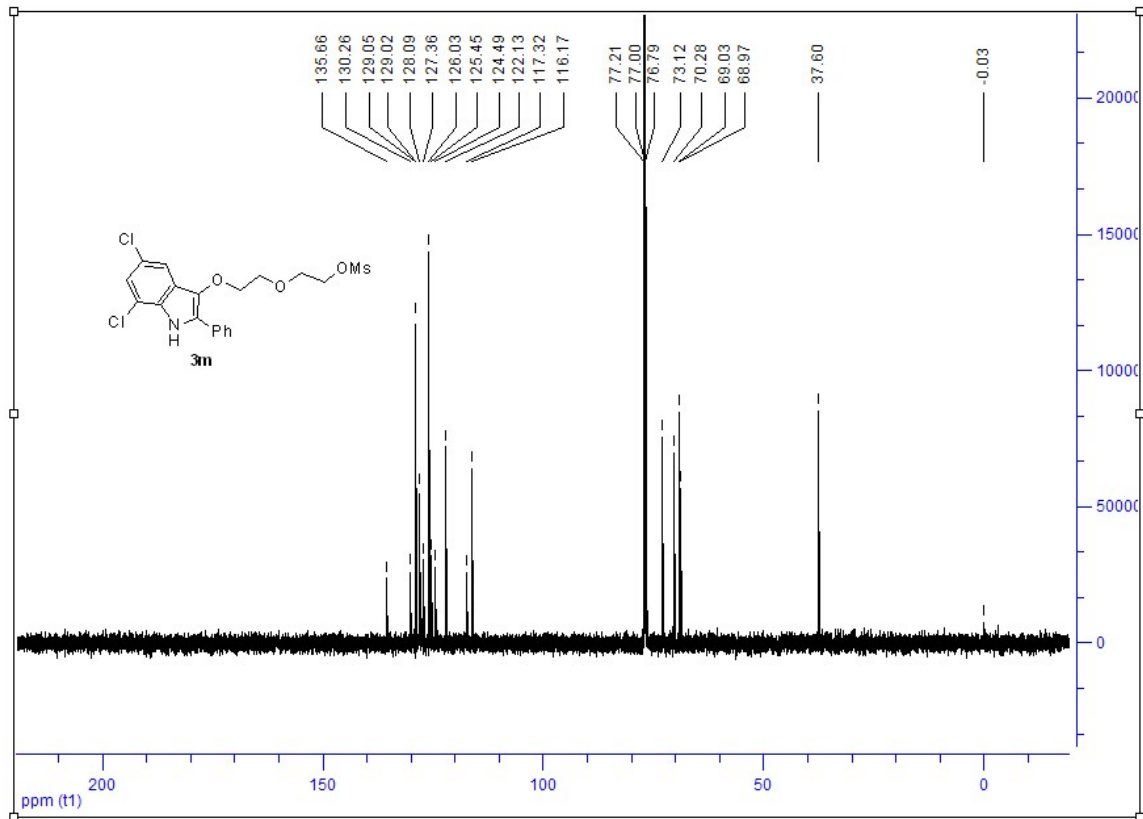

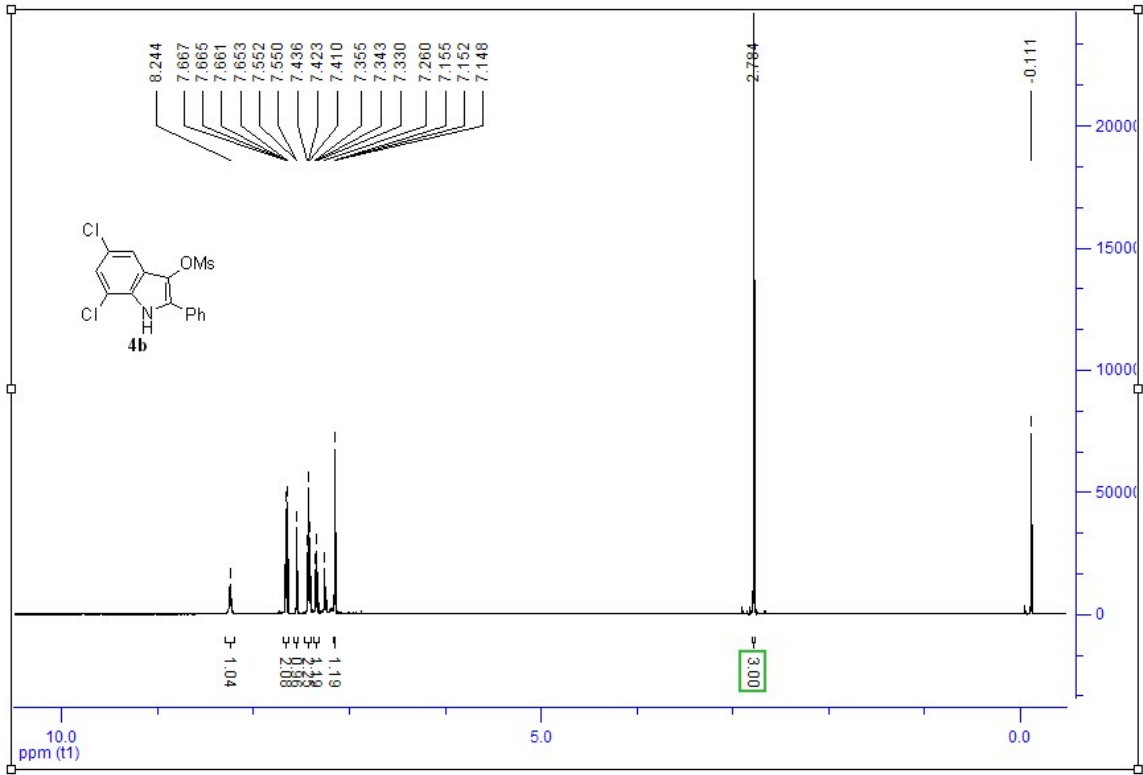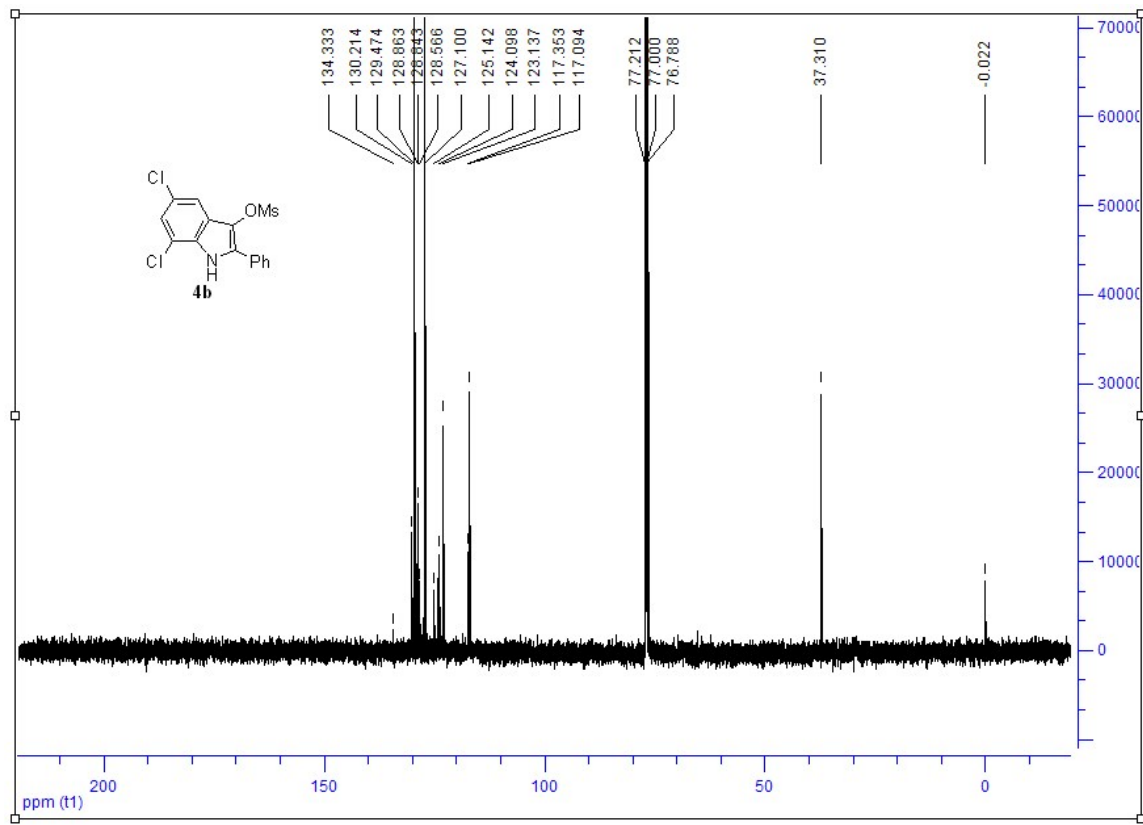

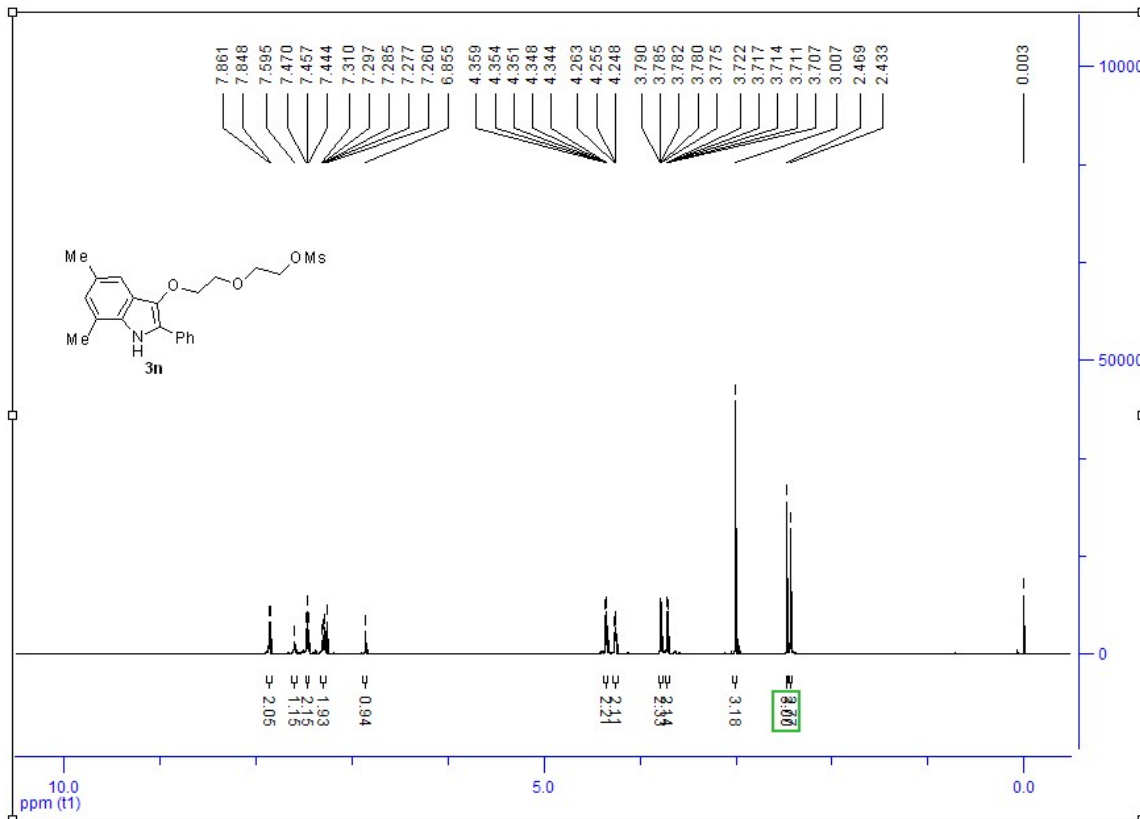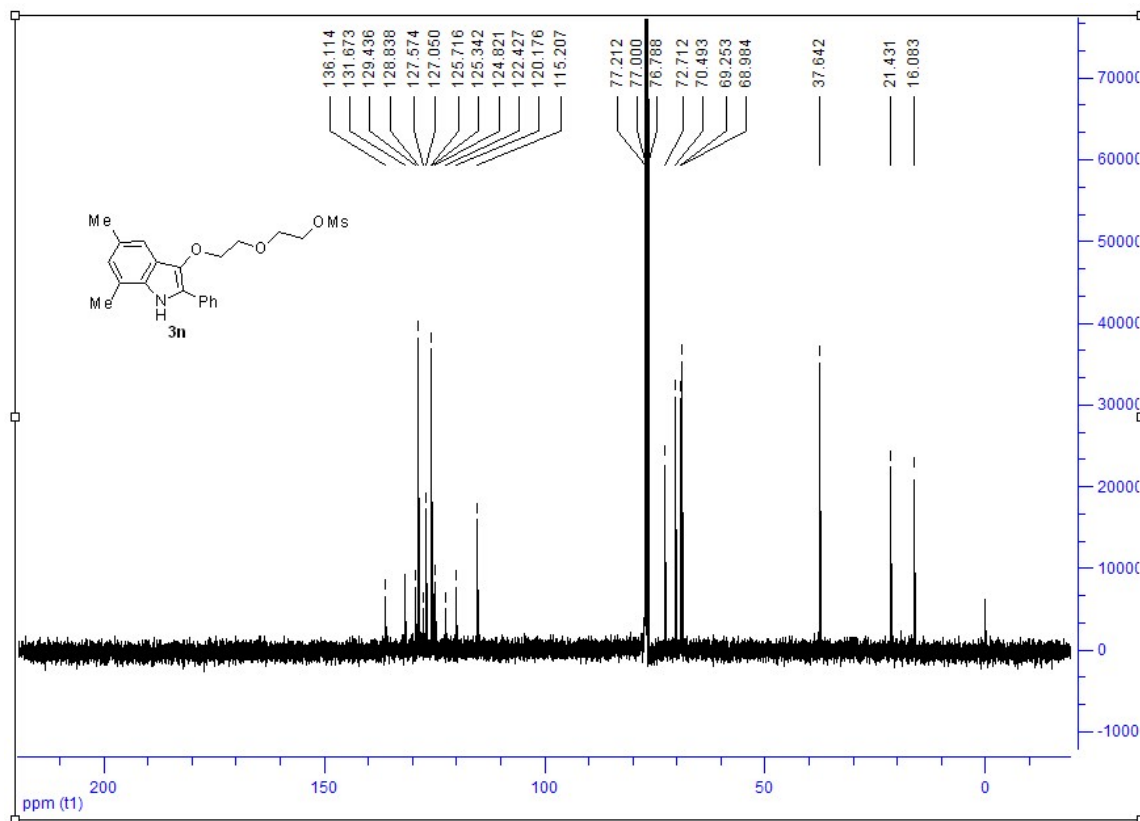

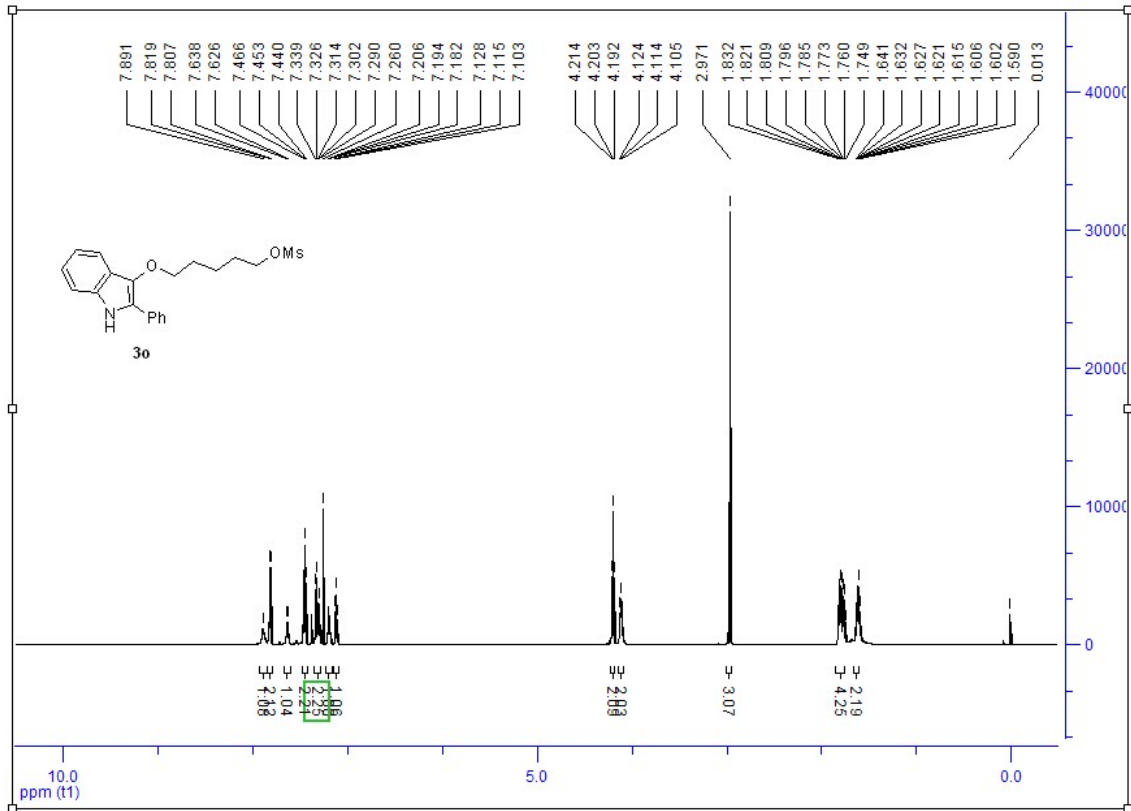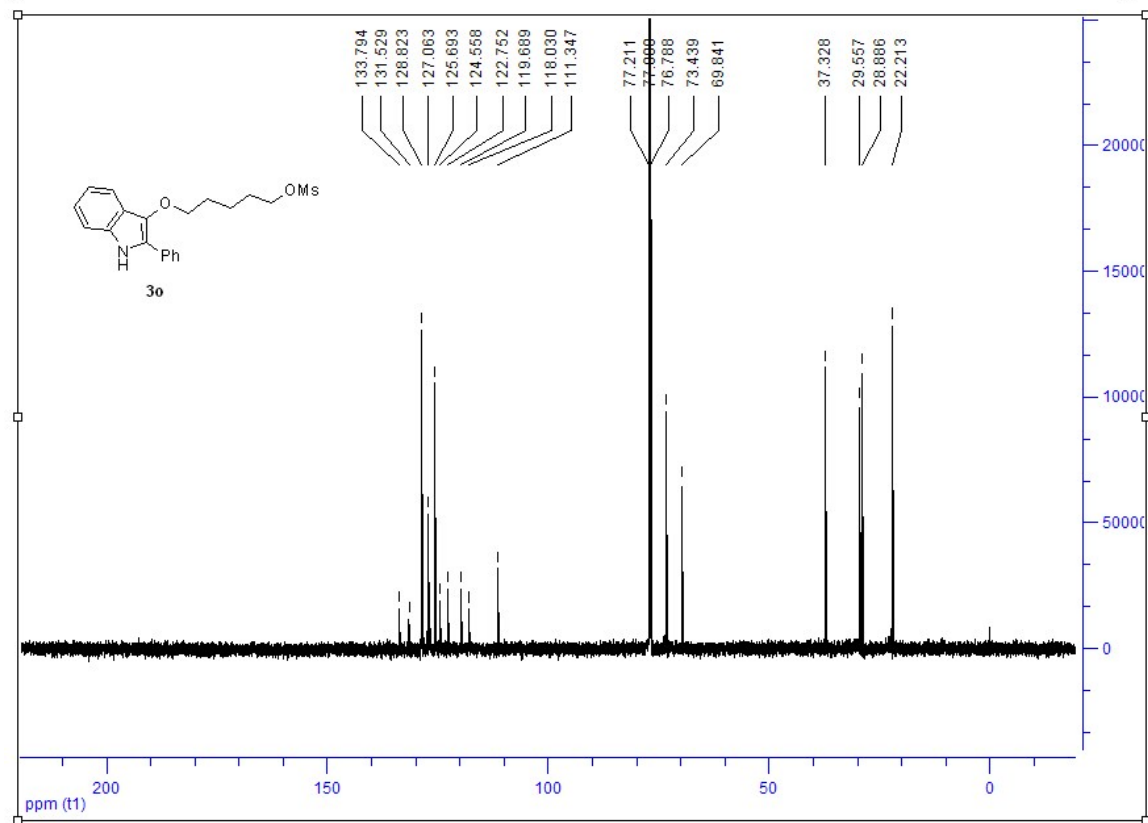

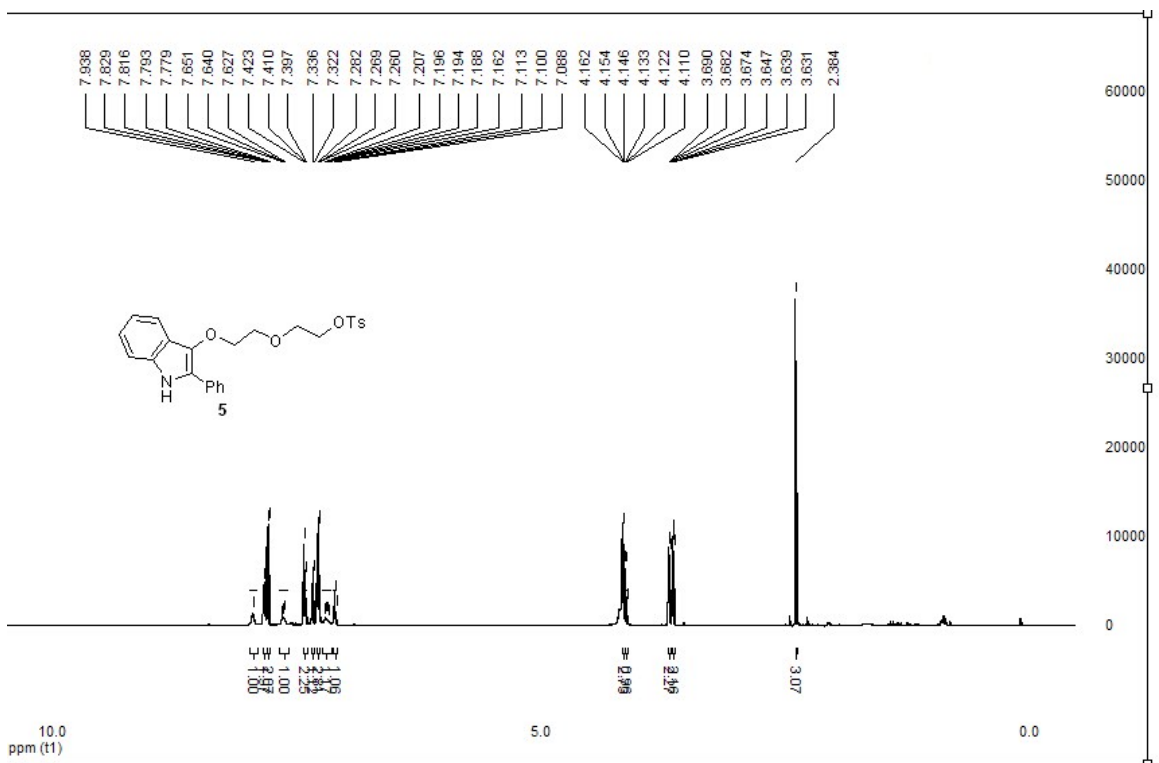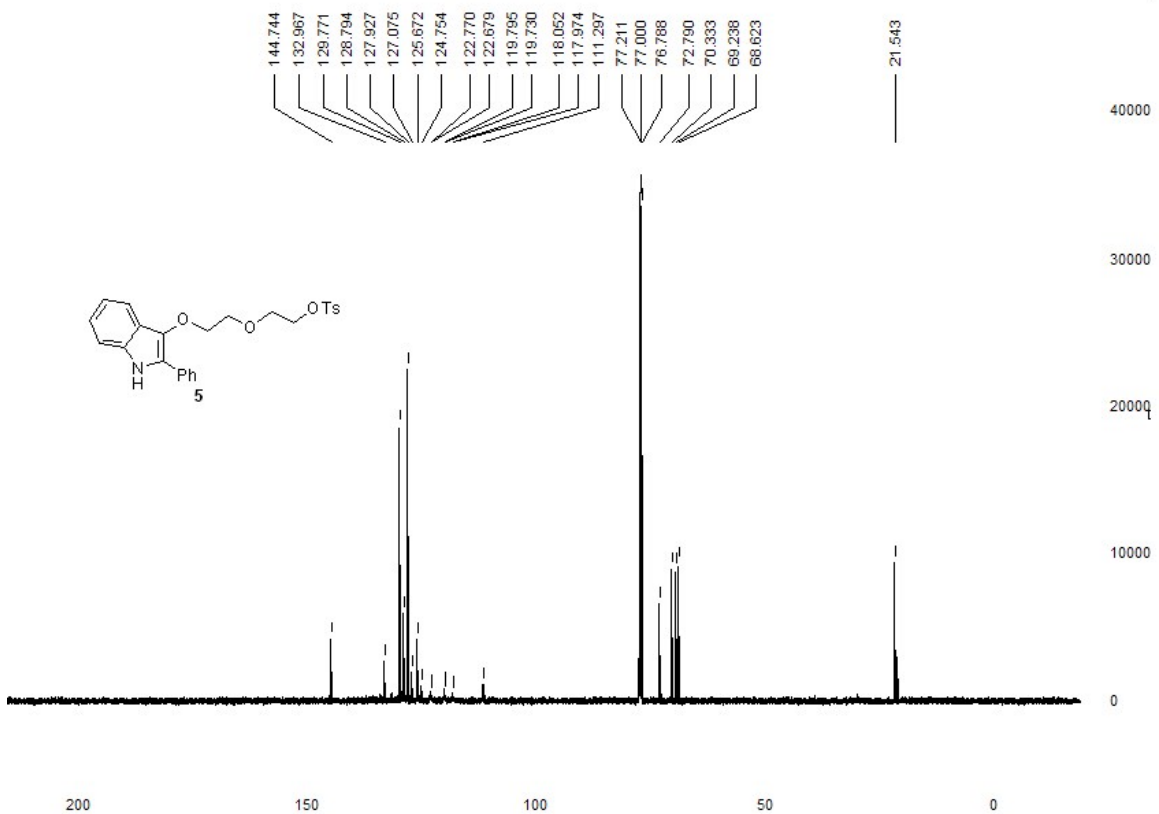

Supplement: c6ra09761h1.pdf [file c6ra09761h1.pdf]
